# Supplementary material for: Assessment of Bioactive Compounds under Simulated Gastrointestinal Digestion of Bee Pollen and Bee Bread: Bioaccessibility and Antioxidant Activity
Source: MDPI journal article supplement (doi:10.3390/antiox10050651), 2021-04-23
Supplement: s1 [file s1]

**Table S1.** Preparation of stock solutions of simulated digestion fluids: simulated saliva fluid (SSF), gastric fluid (SGF) and intestinal fluid (SIF) stock solutions. The final volume for each digestive fluid is 500 mL and at a concentration of  $1.25 \times [1]$ .

| Constituent                                                                                        | Stock conc. |        | SSF           |              | SGF           |              | SIF           |              |
|----------------------------------------------------------------------------------------------------|-------------|--------|---------------|--------------|---------------|--------------|---------------|--------------|
|                                                                                                    |             |        | pH 7          |              | pH 3          |              | pH 7          |              |
|                                                                                                    | g/L         | mol/L  | Vol. of stock | Conc. in SSF | Vol. of stock | Conc. in SGF | Vol. of stock | Conc. in SIF |
|                                                                                                    |             |        | mL            | mmol/L       | mL            | mmol/L       | mL            | mmol/L       |
| KCl                                                                                                | 37.3        | 0.5    | 15.1          | 15.1         | 6.9           | 6.9          | 6.8           | 6.8          |
| KH <sub>2</sub> PO <sub>4</sub>                                                                    | 68          | 0.5    | 3.7           | 3.7          | 0.9           | 0.9          | 0.8           | 0.8          |
| NaHCO <sub>3</sub>                                                                                 | 84          | 1      | 6.8           | 13.6         | 12.5          | 25           | 42.5          | 85           |
| NaCl                                                                                               | 117         | 2      | —             | —            | 11.8          | 47.2         | 9.6           | 38.4         |
| MgCl <sub>2</sub> (H <sub>2</sub> O) <sub>6</sub>                                                  | 30.5        | 0.15   | 0.5           | 0.15         | 0.4           | 0.1          | 1.1           | 0.33         |
| (NH <sub>4</sub> ) <sub>2</sub> CO <sub>3</sub>                                                    | 48          | 0.5    | 0.06          | 0.06         | 0.5           | 0.5          | —             | —            |
| <b>For pH adjustment</b>                                                                           |             |        |               |              |               |              |               |              |
|                                                                                                    | mol/L       |        | mL            | mmol/L       | mL            | mmol/L       | mL            | mmol/L       |
| NaOH                                                                                               | 1           |        | —             | —            | —             | —            | —             | —            |
| HCl                                                                                                | 6           |        | 0.09          | 1.1          | 1.3           | 15.6         | 0.7           | 8.4          |
| <b>CaCl<sub>2</sub>(H<sub>2</sub>O)<sub>2</sub> is not added to the simulated digestion fluids</b> |             |        |               |              |               |              |               |              |
|                                                                                                    | g/L         | mmol/L |               | mmol/L       |               | mmol/L       |               | mmol/L       |
| CaCl <sub>2</sub> (H <sub>2</sub> O) <sub>2</sub>                                                  | 44.1        | 0.3    |               | 1.5*         |               | 0.15*        |               | 0.6*         |

\* is the corresponding Ca<sup>2+</sup> concentration in the final digestion mixture.

**Table S2.** Correlation analysis between phenolic content and antioxidant capacity.

| Assays                                                   | r     | Confidence interval of r | Significance level |
|----------------------------------------------------------|-------|--------------------------|--------------------|
| <b>Between phenolic content and antioxidant capacity</b> |       |                          |                    |
| TPC – DPPH                                               | 0.799 | 0.584 to 0.909           | *                  |
| TPC – Reducing power                                     | 0.743 | 0.484 to 0.881           | *                  |
| TFC – DPPH                                               | 0.784 | 0.557 to 0.902           | *                  |
| TFC – Reducing power                                     | 0.562 | 0.419 to 0.862           | *                  |
| <b>Between phenolic and flavonoid</b>                    |       |                          |                    |
| TPC – TFC                                                | 0.873 | 0.724 to 0.943           | *                  |
| <b>Between DPPH and reducing power</b>                   |       |                          |                    |
| DPPH – Reducing power                                    | 0.839 | 0.658 to 0.928           | *                  |

Twelve paired average samples from each test were used in the comparison. r value represents the Pearson's linear correlation value. The level of significance was expressed as \*p < 0.01.

## References

1. Minekus, M.; Alminger, M.; Alvito, P.; Ballance, S.; Bohn, T.; Bourlieu, C.; Carriere, F.; Boutrou, R.; Corredig, M.; Dupont, D. A standardised static in vitro digestion method suitable for food—an international consensus. *Food Funct.* **2014**, *5*, 1113-1124.
